# Supplementary material for: Iceberg influence on snow distribution and slush formation on Antarctic landfast sea ice from airborne multi-sensor observations
Source: Copernicus journal article supplement (doi:10.5194/egusphere-2025-2657), 2025-06-17

240 mode UWBM reflections, we expect different characteristics particularly for volume scattering making interface return power comparisons between these two modes ambiguous. Therefore, we only use high-altitude mode flights for the determination of interface return power.

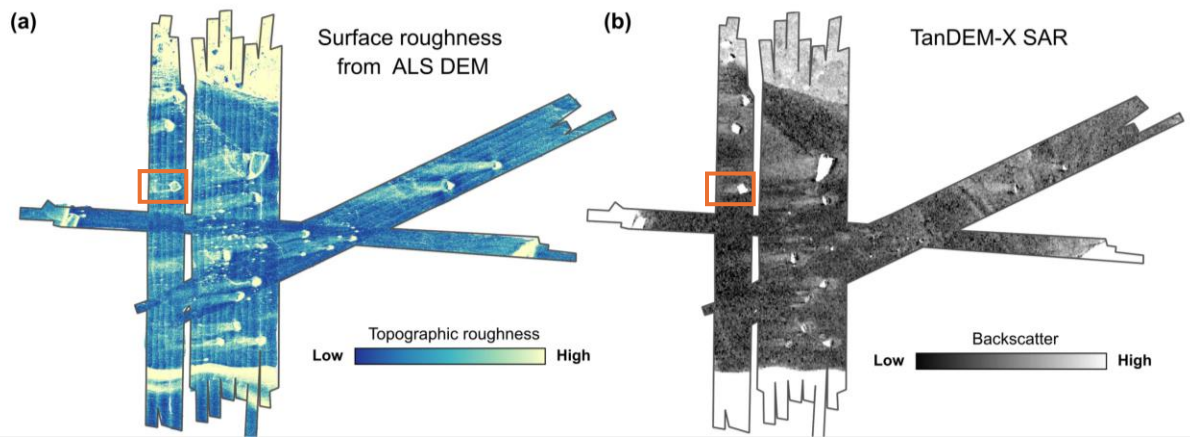

Supplement: Supplementary file [file egusphere-2025-2657-RC1-supplement.pdf]
